# Supplementary material for: Intakes of Added Sugars, with a Focus on Beverages and the Associations with Nutrient Adequacy in US Adults (NHANES 2003–2018)
Source: MDPI journal article supplement (doi:10.3390/nu15183916), 2023-09-09
Supplement: s1 [file s1]

Intakes of added sugars, with a focus on beverages and the associations with nutrient adequacy in US adults (NHANES 2003-2018), Ricciuto L et al.

**Supplemental Figure S1.** NHANES 2003-2018 analytic sample flow chart

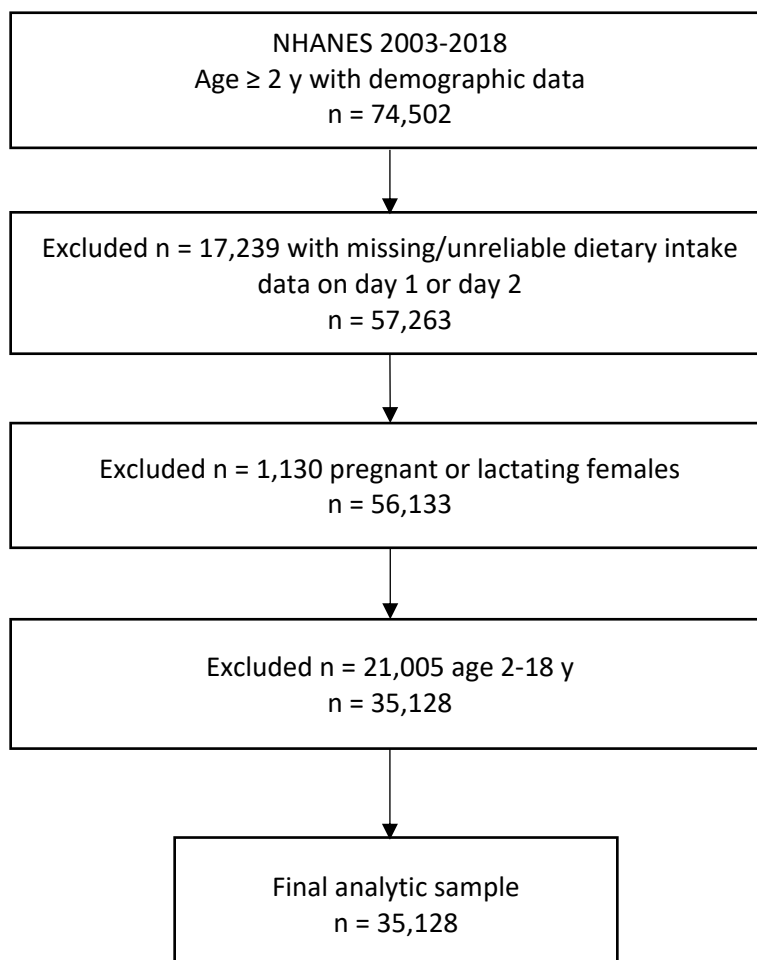

Intakes of added sugars, with a focus on beverages and the associations with nutrient adequacy in US adults (NHANES 2003-2018), Ricciuto L et al.

**Supplemental Table S1.** Demographic description of adults (19+ y) in added sugars analyses from NHANES 2003-2018

| <b>Variable</b>                                 | <b>Mean ± Standard Error</b> |
|-------------------------------------------------|------------------------------|
| Age (mean)                                      | 47.25 ± 0.23                 |
| Gender = Male (%)                               | 48.76 ± 0.36                 |
| Underweight <sup>1</sup> (%)                    | 1.54 ± 0.10                  |
| Normal weight (%)                               | 29.01 ± 0.49                 |
| Overweight (%)                                  | 32.63 ± 0.47                 |
| Obese (%)                                       | 36.82 ± 0.56                 |
| Race/Ethnicity = Mexican American (%)           | 8.40 ± 0.63                  |
| Race/Ethnicity = Other Hispanic (%)             | 5.06 ± 0.39                  |
| Race/Ethnicity = White (%)                      | 68.05 ± 1.21                 |
| Race/Ethnicity = Black (%)                      | 11.40 ± 0.67                 |
| Race/Ethnicity = Other (%)                      | 7.09 ± 0.35                  |
| Poverty Income Ratio (PIR) <sup>2</sup> < 1.35  | 22.28 ± 0.66                 |
| 1.35 ≤ PIR ≤ 1.85                               | 9.87 ± 0.30                  |
| PIR > 1.85                                      | 67.85 ± 0.80                 |
| Physical Activity (PA) <sup>3</sup> = Sedentary | 24.05 ± 0.49                 |
| PA = Moderate                                   | 36.01 ± 0.47                 |
| PA = Vigorous                                   | 39.94 ± 0.59                 |
| Education < HS (%)                              | 15.40 ± 0.51                 |
| Education = HS/GED (%)                          | 23.89 ± 0.50                 |
| Education = Some College (%)                    | 31.90 ± 0.49                 |
| Education ≥ Bachelor's Degree (%)               | 28.80 ± 0.83                 |
| Smoking = Current (%)                           | 19.24 ± 0.51                 |
| Sample N                                        | 35,128                       |
| Population N                                    | 175,304,193                  |

<sup>1</sup>Underweight defined as a body mass index (BMI) < 18.5; normal weight defined as BMI of 18.5-24.9; overweight defined as BMI of 25-29.9; obesity defined as BMI ≥ 30

<sup>2</sup>Poverty income ratio based on household income compared to respective poverty level in the US

<sup>3</sup>Physical activity derived from responses to the physical activity questionnaire

Intakes of added sugars, with a focus on beverages and the associations with nutrient adequacy in US adults (NHANES 2003-2018), Ricciuto L et al.

**Supplemental Table S2.** Percent of adults (19+ y) reporting intake (consumers) of beverage sources of added sugars from the pooled sample (NHANES 2003-2018, n=35,128)

| Food Group         | Sweetened Beverages |        | Soft Drinks  |        | Fruit Drinks |        | Sport and Energy Drinks |        | Coffee and Tea |        | Flavored Milk |        |
|--------------------|---------------------|--------|--------------|--------|--------------|--------|-------------------------|--------|----------------|--------|---------------|--------|
| 19-50 y (n=18,110) |                     |        |              |        |              |        |                         |        |                |        |               |        |
| Year               | Mean ± SE           | P      | Mean ± SE    | P      | Mean ± SE    | P      | Mean ± SE               | P      | Mean ± SE      | P      | Mean ± SE     | P      |
| 2003-04            | 75.65 ± 1.32        |        | 64.37 ± 1.46 |        | 32.14 ± 2.19 |        | 1.20 ± 0.26             |        | 17.78 ± 1.98   |        | 6.05 ± 0.80   |        |
| 2005-06            | 64.32 ± 1.77        | <0.01* | 49.94 ± 1.95 | <0.01* | 25.80 ± 1.53 | 0.02   | 8.72 ± 0.78             | <0.01* | 18.08 ± 1.01   | 0.89   | 6.69 ± 0.67   | 0.54   |
| 2007-08            | 67.31 ± 1.90        | <0.01* | 52.89 ± 2.26 | <0.01* | 25.09 ± 2.13 | 0.02   | 8.56 ± 1.45             | <0.01* | 21.39 ± 1.87   | 0.19   | 4.57 ± 0.78   | 0.19   |
| 2009-10            | 63.72 ± 1.56        | <0.01* | 48.28 ± 1.22 | <0.01* | 25.65 ± 1.30 | 0.01   | 10.17 ± 0.59            | <0.01* | 19.32 ± 1.93   | 0.58   | 4.77 ± 0.47   | 0.17   |
| 2011-12            | 62.45 ± 2.48        | <0.01* | 46.27 ± 2.26 | <0.01* | 23.54 ± 2.44 | <0.01* | 12.95 ± 1.90            | <0.01* | 21.83 ± 1.34   | 0.09   | 4.50 ± 0.74   | 0.16   |
| 2013-14            | 62.30 ± 2.15        | <0.01* | 47.77 ± 1.93 | <0.01* | 18.40 ± 1.28 | <0.01* | 10.47 ± 0.63            | <0.01* | 22.31 ± 1.74   | 0.09   | 5.12 ± 0.53   | 0.34   |
| 2015-16            | 57.51 ± 2.43        | <0.01* | 42.49 ± 2.53 | <0.01* | 17.64 ± 1.05 | <0.01* | 9.88 ± 0.88             | <0.01* | 22.77 ± 2.06   | 0.08   | 3.95 ± 0.65   | 0.04   |
| 2017-18            | 56.53 ± 2.18        | <0.01* | 39.13 ± 2.81 | <0.01* | 17.29 ± 1.32 | <0.01* | 12.37 ± 1.33            | <0.01* | 27.81 ± 1.29   | <0.01* | 3.23 ± 0.52   | <0.01* |
| Trend <sup>1</sup> | Beta ± SE           | P      | Beta ± SE    | P      | Beta ± SE    | P      | Beta ± SE               | P      | Beta ± SE      | P      | Beta ± SE     | P      |
|                    | -2.19 ± 0.30        | <0.01  | -2.75 ± 0.35 | <0.01  | -1.98 ± 0.25 | <0.01  | 1.09 ± 0.15             | <0.01  | 1.18 ± 0.26    | <0.01  | -0.38 ± 0.10  | <0.01  |
| 51-70 y (n=11,379) |                     |        |              |        |              |        |                         |        |                |        |               |        |
| Year               | Mean ± SE           | P      | Mean ± SE    | P      | Mean ± SE    | P      | Mean ± SE               | P      | Mean ± SE      | P      | Mean ± SE     | P      |
| 2003-04            | 53.82 ± 2.70        |        | 38.32 ± 2.62 |        | 21.28 ± 1.38 |        | 0.08 ± 0.06             |        | 12.65 ± 1.80   |        | 3.78 ± 0.88   |        |
| 2005-06            | 49.73 ± 2.02        | 0.23   | 33.85 ± 2.11 | 0.19   | 20.02 ± 1.59 | 0.55   | 4.43 ± 0.87             | <0.01* | 12.95 ± 0.89   | 0.88   | 3.21 ± 0.49   | 0.57   |
| 2007-08            | 46.86 ± 2.47        | 0.06   | 32.77 ± 2.51 | 0.13   | 18.06 ± 1.20 | 0.08   | 2.65 ± 0.45             | <0.01* | 16.82 ± 1.65   | 0.09   | 3.85 ± 0.75   | 0.95   |
| 2009-10            | 42.92 ± 2.08        | <0.01* | 26.62 ± 1.79 | <0.01* | 20.76 ± 1.17 | 0.78   | 2.69 ± 0.34             | <0.01* | 18.07 ± 2.43   | 0.08   | 4.17 ± 0.84   | 0.75   |
| 2011-12            | 48.00 ± 2.36        | 0.11   | 33.14 ± 2.70 | 0.17   | 18.10 ± 1.81 | 0.16   | 3.94 ± 1.02             | <0.01* | 17.35 ± 2.26   | 0.11   | 3.16 ± 0.91   | 0.63   |
| 2013-14            | 45.50 ± 2.66        | 0.03   | 30.86 ± 2.30 | 0.03   | 12.46 ± 1.31 | <0.01* | 3.93 ± 0.70             | <0.01* | 16.03 ± 1.57   | 0.16   | 2.13 ± 0.39   | 0.09   |
| 2015-16            | 40.26 ± 2.29        | <0.01* | 29.00 ± 1.74 | <0.01* | 11.52 ± 1.64 | <0.01* | 4.47 ± 0.68             | <0.01* | 20.26 ± 2.60   | 0.02   | 4.08 ± 0.92   | 0.82   |
| 2017-18            | 44.07 ± 3.21        | 0.02   | 31.91 ± 3.47 | 0.14   | 13.92 ± 1.59 | <0.01* | 4.56 ± 0.98             | <0.01* | 18.11 ± 2.58   | 0.09   | 2.73 ± 0.50   | 0.30   |
| Trend <sup>1</sup> | Beta ± SE           | P      | Beta ± SE    | P      | Beta ± SE    | P      | Beta ± SE               | P      | Beta ± SE      | P      | Beta ± SE     | P      |
|                    | -1.31 ± 0.43        | <0.01  | -0.73 ± 0.43 | 0.09   | -1.36 ± 0.24 | <0.01  | 0.42 ± 0.12             | <0.01  | 0.82 ± 0.33    | 0.02   | -0.11 ± 0.11  | 0.29   |
| 71+ y (n=5,639)    |                     |        |              |        |              |        |                         |        |                |        |               |        |
| Year               | Mean ± SE           | P      | Mean ± SE    | P      | Mean ± SE    | P      | Mean ± SE               | P      | Mean ± SE      | P      | Mean ± SE     | P      |
| 2003-04            | 42.36 ± 2.33        |        | 23.88 ± 2.32 |        | 21.09 ± 2.11 |        | 0.00 ± 0.00             |        | 12.56 ± 3.13   |        | 4.48 ± 1.04   |        |
| 2005-06            | 42.08 ± 3.09        | 0.94   | 24.70 ± 2.66 | 0.82   | 18.74 ± 1.48 | 0.36   | 1.90 ± 0.60             | <0.01* | 9.13 ± 1.40    | 0.32   | 5.62 ± 0.81   | 0.39   |
| 2007-08            | 43.05 ± 2.40        | 0.84   | 23.24 ± 1.87 | 0.83   | 21.12 ± 2.62 | 0.99   | 1.55 ± 0.76             | 0.04   | 12.83 ± 1.25   | 0.94   | 4.73 ± 0.96   | 0.86   |
| 2009-10            | 37.99 ± 1.88        | 0.15   | 22.08 ± 2.03 | 0.56   | 17.90 ± 1.79 | 0.25   | 1.38 ± 0.42             | <0.01* | 12.81 ± 1.58   | 0.95   | 3.51 ± 0.95   | 0.49   |
| 2011-12            | 39.18 ± 2.03        | 0.31   | 21.08 ± 1.96 | 0.36   | 17.06 ± 1.79 | 0.15   | 4.29 ± 1.30             | <0.01* | 10.91 ± 1.65   | 0.64   | 5.03 ± 1.18   | 0.73   |
| 2013-14            | 39.01 ± 3.18        | 0.40   | 19.86 ± 2.29 | 0.22   | 17.29 ± 2.01 | 0.19   | 0.96 ± 0.41             | 0.02   | 14.63 ± 2.53   | 0.61   | 2.85 ± 0.91   | 0.24   |
| 2015-16            | 38.53 ± 2.24        | 0.24   | 20.95 ± 2.27 | 0.37   | 11.20 ± 1.31 | <0.01* | 1.99 ± 0.75             | <0.01* | 16.40 ± 2.81   | 0.36   | 4.91 ± 1.11   | 0.78   |
| 2017-18            | 35.06 ± 2.71        | 0.04   | 20.72 ± 2.31 | 0.34   | 10.81 ± 1.46 | <0.01* | 3.26 ± 0.69             | <0.01* | 15.78 ± 2.04   | 0.39   | 3.72 ± 0.86   | 0.58   |
| Trend <sup>1</sup> | Beta ± SE           | P      | Beta ± SE    | P      | Beta ± SE    | P      | Beta ± SE               | P      | Beta ± SE      | P      | Beta ± SE     | P      |
|                    | -0.96 ± 0.40        | 0.02   | -0.60 ± 0.36 | 0.10   | -1.50 ± 0.27 | <0.01  | 0.29 ± 0.09             | <0.01  | 0.76 ± 0.37    | 0.04   | -0.14 ± 0.15  | 0.34   |

\*Significantly different from reference cycle (2003-04), p<0.01

<sup>1</sup>Linear trend across all cycles, statistically significant at p<0.01

Intakes of added sugars, with a focus on beverages and the associations with nutrient adequacy in US adults (NHANES 2003-2018), Ricciuto L et al.

**Supplemental Table S3.** Trends in added sugars intake (% kcal) from beverage sources and the rest of the diet among all adults and consumers only from the pooled sample (NHANES 2003-2018, n=35,128)

| Food Group         | Sweetened Beverages |        | Soft Drinks  |        | Fruit Drinks |        | Sport and Energy Drinks |        | Coffee and Tea |        | Flavored Milk |        | Rest of the Diet |      |
|--------------------|---------------------|--------|--------------|--------|--------------|--------|-------------------------|--------|----------------|--------|---------------|--------|------------------|------|
| All Individuals    |                     |        |              |        |              |        |                         |        |                |        |               |        |                  |      |
| 19-50 y            |                     |        |              |        |              |        |                         |        |                |        |               |        |                  |      |
| Year               | Mean ± SE           | P      | Mean ± SE    | P      | Mean ± SE    | P      | Mean ± SE               | P      | Mean ± SE      | P      | Mean ± SE     | P      | Mean ± SE        | P    |
| 2003-04            | 8.46 ± 0.32         |        | 6.63 ± 0.35  |        | 1.73 ± 0.16  |        | 0.05 ± 0.02             |        | 0.69 ± 0.10    |        | 0.20 ± 0.04   |        | 7.04 ± 0.18      |      |
| 2005-06            | 6.75 ± 0.37         | <0.01* | 4.92 ± 0.30  | <0.01* | 1.42 ± 0.12  | 0.13   | 0.33 ± 0.04             | <0.01* | 0.82 ± 0.10    | 0.39   | 0.15 ± 0.02   | 0.27   | 7.14 ± 0.19      | 0.72 |
| 2007-08            | 7.12 ± 0.61         | 0.05   | 5.27 ± 0.58  | 0.05   | 1.35 ± 0.12  | 0.06   | 0.43 ± 0.07             | <0.01* | 0.94 ± 0.08    | 0.07   | 0.11 ± 0.02   | 0.05   | 7.15 ± 0.14      | 0.64 |
| 2009-10            | 6.29 ± 0.24         | <0.01* | 4.43 ± 0.21  | <0.01* | 1.38 ± 0.08  | 0.05   | 0.43 ± 0.04             | <0.01* | 0.97 ± 0.14    | 0.11   | 0.10 ± 0.01   | 0.01   | 7.10 ± 0.11      | 0.78 |
| 2011-12            | 5.73 ± 0.31         | <0.01* | 3.90 ± 0.30  | <0.01* | 1.22 ± 0.16  | 0.02   | 0.59 ± 0.09             | <0.01* | 1.26 ± 0.11    | <0.01* | 0.09 ± 0.02   | 0.02   | 6.79 ± 0.18      | 0.32 |
| 2013-14            | 5.82 ± 0.32         | <0.01* | 4.39 ± 0.27  | <0.01* | 0.77 ± 0.06  | <0.01* | 0.57 ± 0.06             | <0.01* | 1.25 ± 0.16    | <0.01* | 0.11 ± 0.01   | 0.03   | 6.82 ± 0.20      | 0.40 |
| 2015-16            | 4.85 ± 0.32         | <0.01* | 3.56 ± 0.28  | <0.01* | 0.67 ± 0.05  | <0.01* | 0.54 ± 0.08             | <0.01* | 1.29 ± 0.14    | <0.01* | 0.09 ± 0.01   | <0.01* | 6.46 ± 0.19      | 0.03 |
| 2017-18            | 4.60 ± 0.36         | <0.01* | 3.19 ± 0.32  | <0.01* | 0.65 ± 0.06  | <0.01* | 0.68 ± 0.10             | <0.01* | 1.32 ± 0.10    | <0.01* | 0.08 ± 0.02   | <0.01* | 6.82 ± 0.23      | 0.45 |
| Trend <sup>1</sup> | Beta ± SE           | P      | Beta ± SE    | P      | Beta ± SE    | P      | Beta ± SE               | P      | Beta ± SE      | P      | Beta ± SE     | P      | Beta ± SE        | P    |
|                    | -0.49 ± 0.06        | <0.01  | -0.40 ± 0.05 | <0.01  | -0.16 ± 0.02 | <0.01  | 0.07 ± 0.01             | <0.01  | 0.09 ± 0.02    | <0.01  | -0.01 ± 0.00  | <0.01  | -0.07 ± 0.03     | 0.01 |
| All Individuals    |                     |        |              |        |              |        |                         |        |                |        |               |        |                  |      |
| 51-70 y            |                     |        |              |        |              |        |                         |        |                |        |               |        |                  |      |
| Year               | Mean ± SE           | P      | Mean ± SE    | P      | Mean ± SE    | P      | Mean ± SE               | P      | Mean ± SE      | P      | Mean ± SE     | P      | Mean ± SE        | P    |
| 2003-04            | 4.24 ± 0.37         |        | 3.06 ± 0.35  |        | 1.09 ± 0.17  |        | 0.00 ± 0.00             |        | 0.51 ± 0.07    |        | 0.08 ± 0.02   |        | 8.08 ± 0.18      |      |
| 2005-06            | 3.86 ± 0.27         | 0.41   | 2.79 ± 0.21  | 0.50   | 0.84 ± 0.10  | 0.21   | 0.18 ± 0.04             | <0.01* | 0.66 ± 0.08    | 0.17   | 0.07 ± 0.01   | 0.52   | 7.71 ± 0.21      | 0.18 |
| 2007-08            | 3.44 ± 0.30         | 0.10   | 2.54 ± 0.25  | 0.23   | 0.70 ± 0.10  | 0.05   | 0.12 ± 0.03             | <0.01* | 0.64 ± 0.08    | 0.19   | 0.07 ± 0.01   | 0.73   | 8.20 ± 0.16      | 0.62 |
| 2009-10            | 3.03 ± 0.21         | <0.01* | 1.81 ± 0.18  | <0.01* | 1.03 ± 0.10  | 0.75   | 0.12 ± 0.02             | <0.01* | 0.94 ± 0.18    | 0.02   | 0.12 ± 0.03   | 0.33   | 7.95 ± 0.16      | 0.59 |
| 2011-12            | 3.43 ± 0.22         | 0.06   | 2.28 ± 0.23  | 0.06   | 0.90 ± 0.13  | 0.38   | 0.22 ± 0.06             | <0.01* | 0.96 ± 0.18    | 0.02   | 0.05 ± 0.02   | 0.33   | 7.76 ± 0.21      | 0.25 |
| 2013-14            | 3.18 ± 0.27         | 0.02   | 2.31 ± 0.24  | 0.08   | 0.55 ± 0.06  | <0.01* | 0.16 ± 0.04             | <0.01* | 0.81 ± 0.10    | 0.01   | 0.08 ± 0.02   | 0.88   | 7.86 ± 0.22      | 0.42 |
| 2015-16            | 3.21 ± 0.36         | 0.05   | 2.52 ± 0.30  | 0.24   | 0.50 ± 0.09  | <0.01* | 0.13 ± 0.02             | <0.01* | 1.46 ± 0.32    | <0.01* | 0.09 ± 0.02   | 0.81   | 7.86 ± 0.17      | 0.36 |
| 2017-18            | 3.24 ± 0.46         | 0.09   | 2.48 ± 0.43  | 0.29   | 0.53 ± 0.07  | <0.01* | 0.18 ± 0.04             | <0.01* | 1.25 ± 0.32    | 0.02   | 0.08 ± 0.02   | 0.84   | 7.92 ± 0.17      | 0.50 |
| Trend <sup>1</sup> | Beta ± SE           | P      | Beta ± SE    | P      | Beta ± SE    | P      | Beta ± SE               | P      | Beta ± SE      | P      | Beta ± SE     | P      | Beta ± SE        | P    |
|                    | -0.12 ± 0.06        | 0.05   | -0.06 ± 0.05 | 0.29   | -0.07 ± 0.02 | <0.01  | 0.01 ± 0.00             | <0.01  | 0.12 ± 0.04    | <0.01  | 0.00 ± 0.00   | 0.95   | -0.02 ± 0.03     | 0.51 |
| All Individuals    |                     |        |              |        |              |        |                         |        |                |        |               |        |                  |      |
| 71+ y              |                     |        |              |        |              |        |                         |        |                |        |               |        |                  |      |
| Year               | Mean ± SE           | P      | Mean ± SE    | P      | Mean ± SE    | P      | Mean ± SE               | P      | Mean ± SE      | P      | Mean ± SE     | P      | Mean ± SE        | P    |
| 2003-04            | 2.57 ± 0.20         |        | 1.60 ± 0.18  |        | 0.79 ± 0.08  |        | 0.00 ± 0.00             |        | 0.70 ± 0.27    |        | 0.12 ± 0.03   |        | 9.22 ± 0.20      |      |
| 2005-06            | 2.16 ± 0.20         | 0.15   | 1.43 ± 0.19  | 0.52   | 0.63 ± 0.06  | 0.12   | 0.05 ± 0.02             | 0.03   | 0.45 ± 0.15    | 0.42   | 0.14 ± 0.02   | 0.56   | 9.19 ± 0.25      | 0.92 |
| 2007-08            | 2.36 ± 0.13         | 0.36   | 1.37 ± 0.13  | 0.31   | 0.78 ± 0.10  | 0.92   | 0.11 ± 0.07             | 0.11   | 0.44 ± 0.05    | 0.35   | 0.12 ± 0.03   | 0.88   | 8.78 ± 0.15      | 0.09 |

Intakes of added sugars, with a focus on beverages and the associations with nutrient adequacy in US adults (NHANES 2003-2018), Ricciuto L et al.

|                          |                  |          |                  |          |                  |          |                  |                      |                  |          |                  |          |                  |          |
|--------------------------|------------------|----------|------------------|----------|------------------|----------|------------------|----------------------|------------------|----------|------------------|----------|------------------|----------|
| <b>2009-10</b>           | 2.40 ± 0.17      | 0.49     | 1.43 ± 0.16      | 0.48     | 0.88 ± 0.16      | 0.62     | 0.03 ± 0.01      | <0.01*               | 0.47 ± 0.08      | 0.41     | 0.11 ± 0.03      | 0.83     | 8.66 ± 0.27      | 0.10     |
| <b>2011-12</b>           | 2.03 ± 0.17      | 0.04     | 1.07 ± 0.13      | 0.02     | 0.75 ± 0.12      | 0.77     | 0.13 ± 0.05      | <0.01*               | 0.58 ± 0.11      | 0.69     | 0.13 ± 0.03      | 0.82     | 9.41 ± 0.38      | 0.65     |
| <b>2013-14</b>           | 2.26 ± 0.33      | 0.41     | 1.31 ± 0.26      | 0.36     | 0.73 ± 0.13      | 0.71     | 0.04 ± 0.02      | 0.05                 | 1.05 ± 0.49      | 0.53     | 0.07 ± 0.02      | 0.20     | 8.73 ± 0.35      | 0.23     |
| <b>2015-16</b>           | 2.00 ± 0.16      | 0.02     | 1.39 ± 0.17      | 0.41     | 0.40 ± 0.06      | <0.01*   | 0.05 ± 0.02      | <0.01*               | 0.92 ± 0.19      | 0.51     | 0.10 ± 0.03      | 0.65     | 8.26 ± 0.22      | <0.01*   |
| <b>2017-18</b>           | 2.10 ± 0.22      | 0.11     | 1.45 ± 0.18      | 0.55     | 0.44 ± 0.09      | <0.01*   | 0.08 ± 0.02      | <0.01*               | 0.76 ± 0.14      | 0.83     | 0.12 ± 0.03      | 0.98     | 8.56 ± 0.21      | 0.02     |
| <b>Trend<sup>1</sup></b> | <b>Beta ± SE</b> | <b>P</b>             | <b>Beta ± SE</b> | <b>P</b> | <b>Beta ± SE</b> | <b>P</b> | <b>Beta ± SE</b> | <b>P</b> |
|                          | -0.06 ± 0.03     | 0.07     | -0.02 ± 0.03     | 0.52     | -0.05 ± 0.01     | <0.01    | 0.00 ± 0.00      | 0.21                 | 0.06 ± 0.03      | 0.08     | 0.00 ± 0.00      | 0.38     | -0.11 ± 0.03     | <0.01    |
| <b>Consumers Only</b>    |                  |          |                  |          |                  |          |                  |                      |                  |          |                  |          |                  |          |
| <b>19-50 y</b>           |                  |          |                  |          |                  |          |                  |                      |                  |          |                  |          |                  |          |
| <b>Year</b>              | <b>Mean ± SE</b> | <b>P</b>             | <b>Mean ± SE</b> | <b>P</b> | <b>Mean ± SE</b> | <b>P</b> | <b>Mean ± SE</b> | <b>P</b> |
| <b>2003-04</b>           | 11.18 ± 0.37     |          | 10.30 ± 0.45     |          | 5.37 ± 0.21      |          | 4.23 ± 1.87      |                      | 3.90 ± 0.27      |          | 3.31 ± 0.36      |          | 7.07 ± 0.18      |          |
| <b>2005-06</b>           | 10.50 ± 0.32     | 0.16     | 9.84 ± 0.31      | 0.41     | 5.51 ± 0.30      | 0.69     | 3.77 ± 0.27      | 0.80                 | 4.54 ± 0.45      | 0.23     | 2.25 ± 0.24      | 0.01     | 7.16 ± 0.19      | 0.71     |
| <b>2007-08</b>           | 10.58 ± 0.74     | 0.47     | 9.96 ± 0.76      | 0.70     | 5.38 ± 0.27      | 0.97     | 4.99 ± 0.65      | 0.70                 | 4.40 ± 0.32      | 0.24     | 2.39 ± 0.27      | 0.04     | 7.20 ± 0.13      | 0.54     |
| <b>2009-10</b>           | 9.88 ± 0.38      | 0.01     | 9.17 ± 0.37      | 0.06     | 5.37 ± 0.27      | 0.99     | 4.26 ± 0.30      | 0.99                 | 5.04 ± 0.33      | <0.01*   | 1.99 ± 0.13      | <0.01*   | 7.13 ± 0.11      | 0.76     |
| <b>2011-12</b>           | 9.18 ± 0.25      | <0.01*   | 8.43 ± 0.33      | <0.01*   | 5.19 ± 0.31      | 0.63     | 4.52 ± 0.24      | 0.88                 | 5.78 ± 0.47      | <0.01*   | 2.10 ± 0.17      | <0.01*   | 6.82 ± 0.17      | 0.32     |
| <b>2013-14</b>           | 9.34 ± 0.32      | <0.01*   | 9.18 ± 0.31      | 0.04     | 4.17 ± 0.16      | <0.01*   | 5.42 ± 0.49      | 0.54                 | 5.59 ± 0.50      | <0.01*   | 2.20 ± 0.14      | <0.01*   | 6.84 ± 0.19      | 0.40     |
| <b>2015-16</b>           | 8.43 ± 0.44      | <0.01*   | 8.37 ± 0.54      | <0.01*   | 3.79 ± 0.20      | <0.01*   | 5.48 ± 0.47      | 0.52                 | 5.68 ± 0.32      | <0.01*   | 2.24 ± 0.27      | 0.02     | 6.51 ± 0.19      | 0.04     |
| <b>2017-18</b>           | 8.13 ± 0.39      | <0.01*   | 8.15 ± 0.42      | <0.01*   | 3.76 ± 0.34      | <0.01*   | 5.49 ± 0.64      | 0.53                 | 4.74 ± 0.29      | 0.04     | 2.57 ± 0.40      | 0.17     | 6.89 ± 0.22      | 0.54     |
| <b>Trend<sup>1</sup></b> | <b>Beta ± SE</b> | <b>P</b>             | <b>Beta ± SE</b> | <b>P</b> | <b>Beta ± SE</b> | <b>P</b> | <b>Beta ± SE</b> | <b>P</b> |
|                          | -0.43 ± 0.06     | <0.01    | -0.31 ± 0.07     | <0.01    | -0.26 ± 0.04     | <0.01    | 0.25 ± 0.10      | 0.01                 | 0.16 ± 0.05      | <0.01    | -0.09 ± 0.05     | 0.11     | -0.07 ± 0.03     | 0.02     |
| <b>Consumers Only</b>    |                  |          |                  |          |                  |          |                  |                      |                  |          |                  |          |                  |          |
| <b>51-70 y</b>           |                  |          |                  |          |                  |          |                  |                      |                  |          |                  |          |                  |          |
| <b>Year</b>              | <b>Mean ± SE</b> | <b>P</b>             | <b>Mean ± SE</b> | <b>P</b> | <b>Mean ± SE</b> | <b>P</b> | <b>Mean ± SE</b> | <b>P</b> |
| <b>2003-04</b>           | 7.87 ± 0.44      |          | 8.00 ± 0.51      |          | 5.11 ± 0.62      |          | 3.87 ± 1.27      |                      | 4.01 ± 0.35      |          | 2.14 ± 0.30      |          | 8.11 ± 0.18      |          |
| <b>2005-06</b>           | 7.76 ± 0.36      | 0.84     | 8.25 ± 0.41      | 0.70     | 4.21 ± 0.33      | 0.20     | 4.17 ± 0.56      | 0.83                 | 5.06 ± 0.57      | 0.12     | 2.03 ± 0.19      | 0.75     | 7.72 ± 0.21      | 0.17     |
| <b>2007-08</b>           | 7.33 ± 0.48      | 0.41     | 7.76 ± 0.53      | 0.75     | 3.90 ± 0.39      | 0.10     | 4.47 ± 0.64      | 0.67                 | 3.83 ± 0.31      | 0.71     | 1.87 ± 0.18      | 0.44     | 8.21 ± 0.16      | 0.68     |
| <b>2009-10</b>           | 7.07 ± 0.31      | 0.14     | 6.79 ± 0.43      | 0.07     | 4.95 ± 0.31      | 0.82     | 4.36 ± 0.40      | 0.71                 | 5.21 ± 0.45      | 0.04     | 2.87 ± 0.42      | 0.17     | 7.96 ± 0.16      | 0.53     |
| <b>2011-12</b>           | 7.14 ± 0.28      | 0.16     | 6.87 ± 0.31      | 0.06     | 4.96 ± 0.49      | 0.86     | 5.69 ± 1.96      | 0.44                 | 5.53 ± 0.84      | 0.10     | 1.65 ± 0.42      | 0.35     | 7.79 ± 0.21      | 0.25     |
| <b>2013-14</b>           | 6.99 ± 0.36      | 0.12     | 7.47 ± 0.41      | 0.42     | 4.39 ± 0.36      | 0.32     | 4.19 ± 0.58      | 0.82                 | 5.07 ± 0.55      | 0.10     | 3.59 ± 0.54      | 0.02     | 7.87 ± 0.22      | 0.41     |
| <b>2015-16</b>           | 7.98 ± 0.75      | 0.90     | 8.69 ± 0.81      | 0.47     | 4.35 ± 0.43      | 0.32     | 2.84 ± 0.31      | 0.43                 | 7.18 ± 0.82      | <0.01*   | 2.17 ± 0.27      | 0.95     | 7.87 ± 0.17      | 0.34     |
| <b>2017-18</b>           | 7.36 ± 0.69      | 0.53     | 7.77 ± 0.87      | 0.82     | 3.83 ± 0.23      | 0.06     | 3.92 ± 0.63      | 0.97                 | 6.90 ± 1.06      | 0.01     | 2.76 ± 0.22      | 0.10     | 7.93 ± 0.17      | 0.46     |
| <b>Trend<sup>1</sup></b> | <b>Beta ± SE</b> | <b>P</b>             | <b>Beta ± SE</b> | <b>P</b> | <b>Beta ± SE</b> | <b>P</b> | <b>Beta ± SE</b> | <b>P</b> |
|                          | -0.04 ± 0.09     | 0.63     | 0.00 ± 0.11      | 0.98     | -0.08 ± 0.07     | 0.22     | -0.16 ± 0.11     | 0.16                 | 0.45 ± 0.13      | <0.01    | 0.09 ± 0.05      | 0.06     | -0.02 ± 0.03     | 0.50     |
| <b>Consumers Only</b>    |                  |          |                  |          |                  |          |                  |                      |                  |          |                  |          |                  |          |
| <b>71+ y</b>             |                  |          |                  |          |                  |          |                  |                      |                  |          |                  |          |                  |          |
| <b>Year</b>              | <b>Mean ± SE</b> | <b>P</b> | <b>Mean ± SE</b> | <b>P</b> | <b>Mean ± SE</b> | <b>P</b> | <b>Mean ± SE</b> | <b>P<sup>2</sup></b> | <b>Mean ± SE</b> | <b>P</b> | <b>Mean ± SE</b> | <b>P</b> | <b>Mean ± SE</b> | <b>P</b> |

Intakes of added sugars, with a focus on beverages and the associations with nutrient adequacy in US adults (NHANES 2003-2018), Ricciuto L et al.

|                          |                  |          |                  |          |                  |          |                           |                   |                  |          |                  |          |                  |          |
|--------------------------|------------------|----------|------------------|----------|------------------|----------|---------------------------|-------------------|------------------|----------|------------------|----------|------------------|----------|
| <b>2003-04</b>           | 6.08 ± 0.36      |          | 6.69 ± 0.47      |          | 3.75 ± 0.35      |          | NA                        | NA                | 5.55 ± 1.00      |          | 2.58 ± 0.32      |          | 9.22 ± 0.20      |          |
| <b>2005-06</b>           | 5.14 ± 0.22      | 0.03     | 5.80 ± 0.37      | 0.14     | 3.34 ± 0.27      | 0.36     | 2.59 ± 0.90               | 0.87              | 4.92 ± 1.25      | 0.70     | 2.42 ± 0.22      | 0.67     | 9.19 ± 0.25      | 0.92     |
| <b>2007-08</b>           | 5.47 ± 0.26      | 0.18     | 5.90 ± 0.43      | 0.21     | 3.68 ± 0.31      | 0.88     | 6.83 ± 3.21               | 0.18              | 3.41 ± 0.22      | 0.04     | 2.58 ± 0.24      | 0.99     | 8.79 ± 0.15      | 0.09     |
| <b>2009-10</b>           | 6.30 ± 0.40      | 0.67     | 6.47 ± 0.47      | 0.73     | 4.91 ± 0.66      | 0.12     | 2.18 ± 0.48               | 0.81              | 3.64 ± 0.50      | 0.09     | 3.02 ± 0.40      | 0.39     | 8.67 ± 0.27      | 0.11     |
| <b>2011-12</b>           | 5.19 ± 0.33      | 0.07     | 5.06 ± 0.35      | <0.01*   | 4.38 ± 0.48      | 0.29     | 2.97 ± 0.43               | 0.50              | 5.32 ± 0.58      | 0.84     | 2.50 ± 0.16      | 0.81     | 9.44 ± 0.38      | 0.62     |
| <b>2013-14</b>           | 5.79 ± 0.46      | 0.62     | 6.58 ± 0.60      | 0.88     | 4.24 ± 0.40      | 0.36     | 3.97 ± 1.22               | 0.27              | 7.18 ± 2.33      | 0.52     | 2.41 ± 0.33      | 0.71     | 8.74 ± 0.35      | 0.23     |
| <b>2015-16</b>           | 5.19 ± 0.21      | 0.03     | 6.66 ± 0.55      | 0.96     | 3.56 ± 0.52      | 0.77     | 2.40 ± 0.58               | 1.00              | 5.58 ± 0.75      | 0.98     | 1.99 ± 0.21      | 0.12     | 8.29 ± 0.22      | <0.01*   |
| <b>2017-18</b>           | 6.00 ± 0.47      | 0.89     | 6.98 ± 0.46      | 0.66     | 4.04 ± 0.65      | 0.70     | 2.39 ± 0.73               |                   | 4.84 ± 0.39      | 0.51     | 3.14 ± 0.42      | 0.29     | 8.58 ± 0.21      | 0.03     |
| <b>Trend<sup>1</sup></b> | <b>Beta ± SE</b> | <b>P</b> | <b>Beta ± SE</b> | <b>P</b> | <b>Beta ± SE</b> | <b>P</b> | <b>Beta ± SE</b>          | <b>P</b>          | <b>Beta ± SE</b> | <b>P</b> | <b>Beta ± SE</b> | <b>P</b> | <b>Beta ± SE</b> | <b>P</b> |
|                          | -0.01 ± 0.06     | 0.89     | 0.09 ± 0.07      | 0.23     | 0.06 ± 0.07      | 0.37     | -0.27 ± 0.24 <sup>2</sup> | 0.27 <sup>2</sup> | 0.13 ± 0.14      | 0.35     | 0.00 ± 0.05      | 0.97     | -0.10 ± 0.03     | <0.01    |

\*Significantly different from reference cycle (2003-04), p<0.01

<sup>1</sup>Linear trend across all cycles, statistically significant at p<0.01

NA: Not available; there were no consumers of this beverage for this age group

<sup>2</sup>Given there were no consumers of this beverage for this age group, the trend Beta is for 2005-2018 and the p-value represents the comparison of all other values to values for 2017-18 rather than for 2003-04

| <b>Food Group</b>                  | <b>Sweetened Beverages</b> |          | <b>Soft Drinks</b> |          | <b>Fruit Drinks</b> |          | <b>Sport and Energy Drinks</b> |          | <b>Coffee and Tea</b> |          | <b>Flavored Milk</b> |          | <b>Rest of the Diet</b> |          |
|------------------------------------|----------------------------|----------|--------------------|----------|---------------------|----------|--------------------------------|----------|-----------------------|----------|----------------------|----------|-------------------------|----------|
| <b>All Individuals<br/>19-50 y</b> |                            |          |                    |          |                     |          |                                |          |                       |          |                      |          |                         |          |
| <b>Year</b>                        | <b>Mean ± SE</b>           | <b>P</b> | <b>Mean ± SE</b>   | <b>P</b> | <b>Mean ± SE</b>    | <b>P</b> | <b>Mean ± SE</b>               | <b>P</b> | <b>Mean ± SE</b>      | <b>P</b> | <b>Mean ± SE</b>     | <b>P</b> | <b>Mean ± SE</b>        | <b>P</b> |
| <b>2003-04</b>                     | 51.11 ± 2.13               |          | 39.90 ± 2.31       |          | 10.69 ± 0.97        |          | 0.25 ± 0.05                    |          | 3.96 ± 0.68           |          | 1.14 ± 0.20          |          | 41.77 ± 1.01            |          |
| <b>2005-06</b>                     | 39.24 ± 1.70               | <0.01*   | 29.06 ± 1.41       | <0.01*   | 7.72 ± 0.67         | 0.01     | 2.08 ± 0.18                    | <0.01*   | 4.70 ± 0.59           | 0.42     | 0.95 ± 0.13          | 0.45     | 40.92 ± 1.39            | 0.62     |
| <b>2007-08</b>                     | 40.16 ± 2.98               | <0.01*   | 29.93 ± 3.00       | <0.01*   | 7.47 ± 0.68         | <0.01*   | 2.45 ± 0.39                    | <0.01*   | 4.51 ± 0.46           | 0.50     | 0.55 ± 0.10          | 0.01     | 39.62 ± 1.18            | 0.17     |
| <b>2009-10</b>                     | 36.51 ± 1.77               | <0.01*   | 25.82 ± 1.51       | <0.01*   | 7.82 ± 0.53         | 0.01     | 2.55 ± 0.20                    | <0.01*   | 5.19 ± 0.65           | 0.19     | 0.54 ± 0.08          | <0.01*   | 39.70 ± 0.99            | 0.15     |
| <b>2011-12</b>                     | 32.67 ± 1.77               | <0.01*   | 22.04 ± 1.79       | <0.01*   | 7.00 ± 0.87         | <0.01*   | 3.50 ± 0.57                    | <0.01*   | 7.02 ± 0.71           | <0.01*   | 0.54 ± 0.11          | 0.01     | 38.34 ± 1.16            | 0.03     |
| <b>2013-14</b>                     | 32.45 ± 2.24               | <0.01*   | 24.71 ± 2.00       | <0.01*   | 4.03 ± 0.30         | <0.01*   | 3.23 ± 0.37                    | <0.01*   | 6.77 ± 0.80           | <0.01*   | 0.62 ± 0.05          | 0.02     | 37.51 ± 1.36            | 0.01     |
| <b>2015-16</b>                     | 26.62 ± 2.01               | <0.01*   | 19.73 ± 1.87       | <0.01*   | 3.44 ± 0.23         | <0.01*   | 2.97 ± 0.36                    | <0.01*   | 7.19 ± 0.74           | <0.01*   | 0.50 ± 0.08          | <0.01*   | 35.37 ± 1.11            | <0.01*   |
| <b>2017-18</b>                     | 25.89 ± 1.89               | <0.01*   | 18.34 ± 1.76       | <0.01*   | 3.49 ± 0.25         | <0.01*   | 3.70 ± 0.56                    | <0.01*   | 7.11 ± 0.62           | <0.01*   | 0.47 ± 0.10          | <0.01*   | 37.49 ± 1.27            | <0.01*   |
| <b>Trend<sup>1</sup></b>           | <b>Beta ± SE</b>           | <b>P</b> | <b>Beta ± SE</b>   | <b>P</b> | <b>Beta ± SE</b>    | <b>P</b> | <b>Beta ± SE</b>               | <b>P</b> | <b>Beta ± SE</b>      | <b>P</b> | <b>Beta ± SE</b>     | <b>P</b> | <b>Beta ± SE</b>        | <b>P</b> |
|                                    | -3.17 ± 0.33               | <0.01    | -2.58 ± 0.32       | <0.01    | -0.99 ± 0.10        | <0.01    | 0.38 ± 0.06                    | <0.01    | 0.51 ± 0.10           | <0.01    | -0.08 ± 0.02         | <0.01    | -0.78 ± 0.18            | <0.01    |
| <b>All Individuals<br/>51-70 y</b> |                            |          |                    |          |                     |          |                                |          |                       |          |                      |          |                         |          |
| <b>Year</b>                        | <b>Mean ± SE</b>           | <b>P</b> | <b>Mean ± SE</b>   | <b>P</b> | <b>Mean ± SE</b>    | <b>P</b> | <b>Mean ± SE</b>               | <b>P</b> | <b>Mean ± SE</b>      | <b>P</b> | <b>Mean ± SE</b>     | <b>P</b> | <b>Mean ± SE</b>        | <b>P</b> |
| <b>2003-04</b>                     | 21.29 ± 2.05               |          | 15.22 ± 1.73       |          | 5.70 ± 1.13         |          | 0.02 ± 0.01                    |          | 2.42 ± 0.32           |          | 0.44 ± 0.12          |          | 39.26 ± 1.39            |          |
| <b>2005-06</b>                     | 20.11 ± 1.61               | 0.65     | 14.43 ± 1.33       | 0.72     | 4.34 ± 0.49         | 0.27     | 1.19 ± 0.24                    | <0.01*   | 3.17 ± 0.40           | 0.15     | 0.35 ± 0.05          | 0.48     | 39.38 ± 1.73            | 0.96     |
| <b>2007-08</b>                     | 17.24 ± 1.58               | 0.12     | 12.86 ± 1.30       | 0.28     | 3.50 ± 0.50         | 0.08     | 0.59 ± 0.13                    | <0.01*   | 3.39 ± 0.46           | 0.09     | 0.36 ± 0.08          | 0.60     | 41.31 ± 0.91            | 0.22     |
| <b>2009-10</b>                     | 15.46 ± 1.11               | 0.01     | 9.26 ± 0.92        | <0.01*   | 5.25 ± 0.61         | 0.72     | 0.60 ± 0.08                    | <0.01*   | 4.69 ± 0.89           | 0.02     | 0.65 ± 0.16          | 0.27     | 41.80 ± 1.29            | 0.18     |
| <b>2011-12</b>                     | 17.83 ± 1.22               | 0.15     | 11.64 ± 1.20       | 0.09     | 4.79 ± 0.82         | 0.51     | 1.26 ± 0.37                    | <0.01*   | 5.23 ± 1.21           | 0.03     | 0.27 ± 0.08          | 0.24     | 40.37 ± 1.40            | 0.58     |
| <b>2013-14</b>                     | 16.53 ± 1.55               | 0.07     | 12.03 ± 1.43       | 0.16     | 2.95 ± 0.30         | 0.02     | 0.74 ± 0.15                    | <0.01*   | 4.23 ± 0.49           | <0.01*   | 0.31 ± 0.07          | 0.33     | 40.27 ± 1.54            | 0.63     |
| <b>2015-16</b>                     | 17.06 ± 2.11               | 0.15     | 13.48 ± 1.85       | 0.49     | 2.55 ± 0.48         | 0.01     | 0.72 ± 0.14                    | <0.01*   | 7.74 ± 1.58           | <0.01*   | 0.48 ± 0.11          | 0.80     | 39.89 ± 1.09            | 0.72     |
| <b>2017-18</b>                     | 17.33 ± 2.09               | 0.18     | 13.01 ± 1.98       | 0.40     | 2.90 ± 0.43         | 0.02     | 1.15 ± 0.34                    | <0.01*   | 6.28 ± 1.63           | 0.02     | 0.36 ± 0.07          | 0.58     | 42.44 ± 1.55            | 0.13     |
| <b>Trend<sup>1</sup></b>           | <b>Beta ± SE</b>           | <b>P</b> | <b>Beta ± SE</b>   | <b>P</b> | <b>Beta ± SE</b>    | <b>P</b> | <b>Beta ± SE</b>               | <b>P</b> |                       |          |                      |          |                         |          |

Intakes of added sugars, with a focus on beverages and the associations with nutrient adequacy in US adults (NHANES 2003-2018), Ricciuto L et al.

|                          |                  |          |                  |          |                  |          |                  |          |                  |          |                  |          |                  |          |
|--------------------------|------------------|----------|------------------|----------|------------------|----------|------------------|----------|------------------|----------|------------------|----------|------------------|----------|
| <b>2003-04</b>           | 10.28 ± 0.79     |          | 6.15 ± 0.63      |          | 3.27 ± 0.34      |          | 0.00 ± 0.00      |          | 2.38 ± 0.84      |          | 0.53 ± 0.15      |          | 38.89 ± 1.11     |          |
| <b>2005-06</b>           | 8.78 ± 0.85      | 0.20     | 5.79 ± 0.70      | 0.71     | 2.53 ± 0.33      | 0.12     | 0.21 ± 0.09      | 0.02     | 1.74 ± 0.43      | 0.50     | 0.58 ± 0.10      | 0.78     | 40.41 ± 1.64     | 0.44     |
| <b>2007-08</b>           | 9.43 ± 0.58      | 0.39     | 5.48 ± 0.50      | 0.41     | 3.12 ± 0.38      | 0.78     | 0.41 ± 0.24      | 0.09     | 1.79 ± 0.22      | 0.50     | 0.46 ± 0.09      | 0.71     | 36.99 ± 1.33     | 0.28     |
| <b>2009-10</b>           | 9.41 ± 0.63      | 0.39     | 5.94 ± 0.66      | 0.82     | 3.12 ± 0.46      | 0.80     | 0.13 ± 0.04      | <0.01*   | 1.93 ± 0.34      | 0.62     | 0.42 ± 0.13      | 0.62     | 37.65 ± 1.59     | 0.52     |
| <b>2011-12</b>           | 8.97 ± 0.64      | 0.20     | 4.56 ± 0.50      | 0.05     | 3.36 ± 0.54      | 0.88     | 0.59 ± 0.19      | <0.01*   | 2.79 ± 0.53      | 0.68     | 0.59 ± 0.16      | 0.78     | 43.03 ± 2.55     | 0.14     |
| <b>2013-14</b>           | 10.22 ± 1.69     | 0.98     | 6.28 ± 1.42      | 0.93     | 3.01 ± 0.55      | 0.69     | 0.16 ± 0.08      | 0.04     | 7.06 ± 4.28      | 0.28     | 0.33 ± 0.09      | 0.28     | 40.70 ± 2.11     | 0.45     |
| <b>2015-16</b>           | 8.65 ± 0.61      | 0.11     | 5.75 ± 0.66      | 0.66     | 2.00 ± 0.39      | 0.02     | 0.27 ± 0.10      | <0.01*   | 4.08 ± 0.69      | 0.12     | 0.44 ± 0.12      | 0.67     | 37.25 ± 1.43     | 0.37     |
| <b>2017-18</b>           | 9.02 ± 0.85      | 0.28     | 6.07 ± 0.68      | 0.94     | 1.95 ± 0.38      | 0.01     | 0.36 ± 0.11      | <0.01*   | 3.41 ± 0.58      | 0.31     | 0.50 ± 0.12      | 0.91     | 41.77 ± 1.08     | 0.07     |
| <b>Trend<sup>1</sup></b> | <b>Beta ± SE</b> | <b>P</b> |
|                          | -0.09 ± 0.13     | 0.47     | 0.01 ± 0.11      | 0.93     | -0.15 ± 0.06     | <0.01    | 0.03 ± 0.02      | 0.07     | 0.41 ± 0.16      | 0.01     | -0.01 ± 0.02     | 0.55     | 0.24 ± 0.20      | 0.25     |
| <b>Consumers Only</b>    |                  |          |                  |          |                  |          |                  |          |                  |          |                  |          |                  |          |
| <b>19-50 y</b>           |                  |          |                  |          |                  |          |                  |          |                  |          |                  |          |                  |          |
| <b>Year</b>              | <b>Mean ± SE</b> | <b>P</b> |
| <b>2003-04</b>           | 67.57 ± 2.39     |          | 61.99 ± 2.93     |          | 33.27 ± 1.32     |          | 21.09 ± 1.90     |          | 22.27 ± 1.82     |          | 18.78 ± 1.77     |          | 41.90 ± 1.02     |          |
| <b>2005-06</b>           | 61.00 ± 1.40     | 0.02     | 58.19 ± 1.53     | 0.25     | 29.90 ± 1.34     | 0.08     | 23.89 ± 0.87     | 0.18     | 25.97 ± 2.43     | 0.22     | 14.22 ± 1.56     | 0.06     | 41.06 ± 1.37     | 0.62     |
| <b>2007-08</b>           | 59.67 ± 3.56     | 0.07     | 56.60 ± 3.64     | 0.25     | 29.77 ± 1.35     | 0.07     | 28.64 ± 2.66     | 0.02     | 21.11 ± 1.30     | 0.60     | 11.94 ± 0.94     | <0.01*   | 39.92 ± 1.14     | 0.19     |
| <b>2009-10</b>           | 57.30 ± 2.69     | <0.01*   | 53.48 ± 2.79     | 0.04     | 30.47 ± 1.67     | 0.19     | 25.10 ± 1.10     | 0.07     | 26.87 ± 1.47     | 0.05     | 11.24 ± 0.90     | <0.01*   | 39.86 ± 0.98     | 0.15     |
| <b>2011-12</b>           | 52.32 ± 1.64     | <0.01*   | 47.63 ± 2.23     | <0.01*   | 29.75 ± 1.90     | 0.13     | 27.04 ± 1.89     | 0.03     | 32.16 ± 2.59     | <0.01*   | 11.94 ± 0.72     | <0.01*   | 38.46 ± 1.14     | 0.03     |
| <b>2013-14</b>           | 52.09 ± 2.33     | <0.01*   | 51.73 ± 2.88     | 0.01     | 21.93 ± 0.76     | <0.01*   | 30.89 ± 3.16     | <0.01*   | 30.35 ± 2.26     | <0.01*   | 12.15 ± 0.82     | <0.01*   | 37.62 ± 1.37     | 0.01     |
| <b>2015-16</b>           | 46.28 ± 3.01     | <0.01*   | 46.43 ± 3.90     | <0.01*   | 19.52 ± 0.92     | <0.01*   | 30.03 ± 1.79     | <0.01*   | 31.56 ± 1.95     | <0.01*   | 12.71 ± 1.43     | <0.01*   | 35.64 ± 1.12     | <0.01*   |
| <b>2017-18</b>           | 45.79 ± 2.08     | <0.01*   | 46.87 ± 2.33     | <0.01*   | 20.18 ± 1.84     | <0.01*   | 29.90 ± 3.90     | 0.04     | 25.58 ± 1.63     | 0.18     | 14.48 ± 1.96     | 0.11     | 37.88 ± 1.26     | 0.01     |
| <b>Trend<sup>1</sup></b> | <b>Beta ± SE</b> | <b>P</b> |
|                          | -3.05 ± 0.38     | <0.01    | -2.26 ± 0.46     | <0.01    | -1.92 ± 0.22     | <0.01    | 0.99 ± 0.52      | 0.06     | 0.90 ± 0.29      | <0.01    | -0.58 ± 0.28     | 0.04     | -0.76 ± 0.18     | <0.01    |
| <b>Consumers Only</b>    |                  |          |                  |          |                  |          |                  |          |                  |          |                  |          |                  |          |
| <b>51-70 y</b>           |                  |          |                  |          |                  |          |                  |          |                  |          |                  |          |                  |          |
| <b>Year</b>              | <b>Mean ± SE</b> | <b>P</b> |
| <b>2003-04</b>           | 39.55 ± 2.48     |          | 39.72 ± 2.69     |          | 26.81 ± 4.40     |          | 19.05 ± 2.45     |          | 19.10 ± 1.68     |          | 11.56 ± 1.01     |          | 39.40 ± 1.43     |          |
| <b>2005-06</b>           | 40.44 ± 2.23     | 0.79     | 42.63 ± 2.81     | 0.46     | 21.70 ± 1.56     | 0.28     | 26.80 ± 3.29     | 0.06     | 24.44 ± 2.90     | 0.11     | 10.80 ± 0.99     | 0.59     | 39.44 ± 1.73     | 0.98     |
| <b>2007-08</b>           | 36.78 ± 2.59     | 0.44     | 39.23 ± 2.86     | 0.90     | 19.40 ± 2.17     | 0.13     | 22.21 ± 3.36     | 0.45     | 20.17 ± 2.03     | 0.69     | 9.44 ± 0.82      | 0.11     | 41.36 ± 0.91     | 0.25     |
| <b>2009-10</b>           | 36.02 ± 1.64     | 0.24     | 34.80 ± 2.03     | 0.15     | 25.29 ± 2.19     | 0.76     | 22.41 ± 2.33     | 0.32     | 25.97 ± 2.20     | 0.01     | 15.66 ± 2.01     | 0.07     | 41.83 ± 1.29     | 0.21     |
| <b>2011-12</b>           | 37.14 ± 1.69     | 0.42     | 35.11 ± 1.49     | 0.14     | 26.45 ± 3.13     | 0.95     | 32.06 ± 11.44    | 0.27     | 30.17 ± 6.09     | 0.08     | 8.51 ± 1.63      | 0.11     | 40.51 ± 1.38     | 0.58     |
| <b>2013-14</b>           | 36.34 ± 2.02     | 0.32     | 38.99 ± 2.56     | 0.84     | 23.70 ± 2.17     | 0.53     | 18.82 ± 2.42     | 0.95     | 26.36 ± 2.56     | 0.02     | 14.38 ± 1.15     | 0.07     | 40.35 ± 1.54     | 0.65     |
| <b>2015-16</b>           | 42.37 ± 4.76     | 0.60     | 46.48 ± 5.24     | 0.25     | 22.16 ± 1.81     | 0.33     | 16.05 ± 1.77     | 0.32     | 38.21 ± 4.06     | <0.01*   | 11.72 ± 1.35     | 0.92     | 39.96 ± 1.10     | 0.75     |



Intakes of added sugars, with a focus on beverages and the associations with nutrient adequacy in US adults (NHANES 2003-2018), Ricciuto L et al.

|                                 |                  |          |                  |          |                  |          |                           |                      |                  |          |                  |          |                  |          |
|---------------------------------|------------------|----------|------------------|----------|------------------|----------|---------------------------|----------------------|------------------|----------|------------------|----------|------------------|----------|
| <b>2017-18</b>                  | 39.33 ± 3.28     | 0.96     | 40.77 ± 3.88     | 0.82     | 20.81 ± 1.37     | 0.20     | 25.28 ± 6.08              | 0.34                 | 34.67 ± 5.50     | <0.01*   | 13.25 ± 1.22     | 0.29     | 42.49 ± 1.56     | 0.15     |
| <b>Trend<sup>1</sup></b>        | <b>Beta ± SE</b> | <b>P</b> | <b>Beta ± SE</b> | <b>P</b> | <b>Beta ± SE</b> | <b>P</b> | <b>Beta ± SE</b>          | <b>P</b>             | <b>Beta ± SE</b> | <b>P</b> | <b>Beta ± SE</b> | <b>P</b> | <b>Beta ± SE</b> | <b>P</b> |
|                                 | 0.08 ± 0.48      | 0.86     | 0.31 ± 0.55      | 0.58     | -0.31 ± 0.44     | 0.48     | -0.78 ± 0.86              | 0.36                 | 2.50 ± 0.66      | <0.01    | 0.24 ± 0.19      | 0.21     | 0.24 ± 0.23      | 0.30     |
| <b>Consumers Only<br/>71+ y</b> |                  |          |                  |          |                  |          |                           |                      |                  |          |                  |          |                  |          |
| <b>Year</b>                     | <b>Mean ± SE</b> | <b>P</b> | <b>Mean ± SE</b> | <b>P</b> | <b>Mean ± SE</b> | <b>P</b> | <b>Mean ± SE</b>          | <b>P<sup>2</sup></b> | <b>Mean ± SE</b> | <b>P</b> | <b>Mean ± SE</b> | <b>P</b> | <b>Mean ± SE</b> | <b>P</b> |
| <b>2003-04</b>                  | 24.26 ± 1.30     |          | 25.74 ± 1.47     |          | 15.49 ± 1.38     |          | NA                        | NA                   | 18.92 ± 2.92     |          | 11.73 ± 1.74     |          | 38.89 ± 1.11     |          |
| <b>2005-06</b>                  | 20.85 ± 0.91     | 0.03     | 23.45 ± 1.39     | 0.26     | 13.51 ± 1.30     | 0.30     | 10.83 ± 3.48              | 0.94                 | 19.10 ± 2.82     | 0.97     | 10.25 ± 1.19     | 0.48     | 40.41 ± 1.64     | 0.44     |
| <b>2007-08</b>                  | 21.91 ± 1.15     | 0.18     | 23.59 ± 1.47     | 0.30     | 14.78 ± 1.22     | 0.70     | 26.54 ± 11.45             | 0.20                 | 13.91 ± 0.97     | 0.11     | 9.71 ± 0.65      | 0.28     | 37.00 ± 1.33     | 0.28     |
| <b>2009-10</b>                  | 24.77 ± 1.24     | 0.78     | 26.89 ± 1.83     | 0.62     | 17.42 ± 1.75     | 0.39     | 9.66 ± 1.92               | 0.69                 | 15.06 ± 2.18     | 0.29     | 12.09 ± 1.58     | 0.88     | 37.70 ± 1.58     | 0.54     |
| <b>2011-12</b>                  | 22.89 ± 1.20     | 0.44     | 21.63 ± 1.09     | 0.03     | 19.69 ± 2.20     | 0.11     | 13.77 ± 1.92              | 0.49                 | 25.60 ± 3.88     | 0.17     | 11.64 ± 1.17     | 0.97     | 43.13 ± 2.55     | 0.13     |
| <b>2013-14</b>                  | 26.20 ± 2.57     | 0.50     | 31.64 ± 3.81     | 0.15     | 17.41 ± 1.78     | 0.40     | 16.82 ± 4.49              | 0.31                 | 48.26 ± 22.45    | 0.20     | 11.70 ± 1.69     | 0.99     | 40.72 ± 2.11     | 0.44     |
| <b>2015-16</b>                  | 22.44 ± 1.09     | 0.28     | 27.43 ± 2.41     | 0.55     | 17.88 ± 3.72     | 0.55     | 13.48 ± 1.32              | 0.51                 | 24.91 ± 2.45     | 0.12     | 9.03 ± 1.17      | 0.20     | 37.40 ± 1.43     | 0.41     |
| <b>2017-18</b>                  | 25.72 ± 1.83     | 0.52     | 29.30 ± 1.72     | 0.12     | 18.04 ± 2.51     | 0.37     | 11.17 ± 3.26              |                      | 21.61 ± 1.68     | 0.43     | 13.50 ± 1.50     | 0.44     | 41.89 ± 1.09     | 0.06     |
| <b>Trend<sup>1</sup></b>        | <b>Beta ± SE</b> | <b>P</b> | <b>Beta ± SE</b> | <b>P</b> | <b>Beta ± SE</b> | <b>P</b> | <b>Beta ± SE</b>          | <b>P</b>             | <b>Beta ± SE</b> | <b>P</b> | <b>Beta ± SE</b> | <b>P</b> | <b>Beta ± SE</b> | <b>P</b> |
|                                 | 0.33 ± 0.23      | 0.15     | 0.75 ± 0.29      | 0.01     | 0.62 ± 0.33      | 0.06     | -0.71 ± 0.93 <sup>2</sup> | 0.44 <sup>2</sup>    | 1.66 ± 0.75      | 0.03     | 0.10 ± 0.23      | 0.65     | 0.26 ± 0.20      | 0.21     |

\*Significantly different from reference cycle (2003-04), p<0.01

<sup>1</sup>Linear trend across all cycles, statistically significant at p<0.01

NA: Not available; there were no consumers of this beverage for this age group

<sup>2</sup>Given there were no consumers of this beverage for this age group, the trend Beta is for 2005-2018 and the p-value represents the comparison of all other values to values for 2017-18 rather than for 2003-04

Intakes of added sugars, with a focus on beverages and the associations with nutrient adequacy in US adults (NHANES 2003-2018), Ricciuto L et al.

**Supplemental Figure S2.** Change in % <EAR (>AI<sup>†</sup>) in association with increased added sugars intake from select beverage sources: **A.** soft drinks and **B.** fruit drinks, by NHANES 4-y cycles, among adults (19+ y)

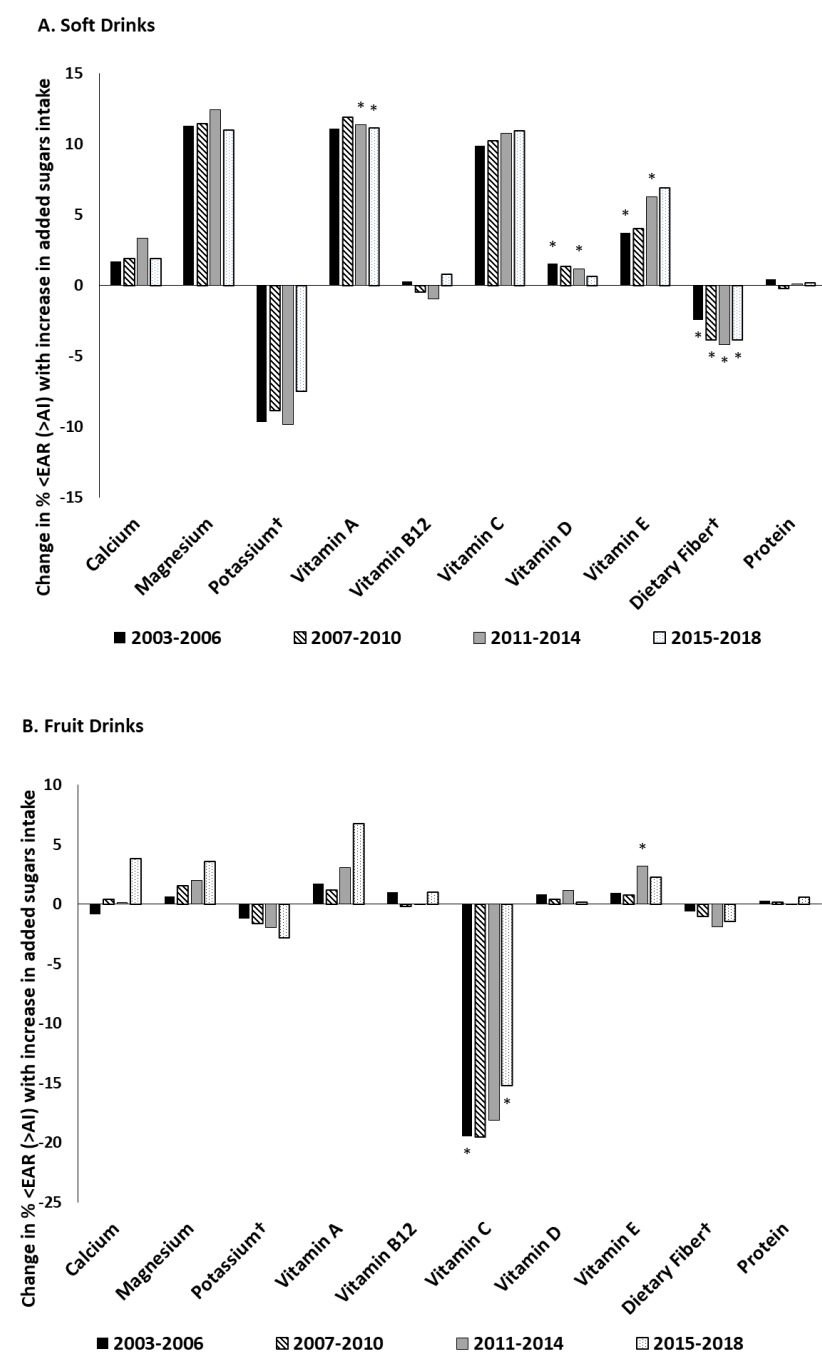

EAR, estimated average requirement; AI, adequate intake

<sup>†</sup>>AI for potassium and dietary fiber

\*Statistically significant at  $p < 0.05$ ; from regression analysis, test for trend across quantiles of added sugars intake

Intakes of added sugars, with a focus on beverages and the associations with nutrient adequacy in US adults (NHANES 2003-2018), Ricciuto L et al.

**Supplemental Figure S2.** Change in % <EAR (>AI<sup>†</sup>) in association with increased added sugars intake from select beverage sources: **C.** sport and energy drinks and **D.** coffee and tea, by NHANES 4-y cycles, among adults (19+ y)

**C. Sport and Energy Drinks**

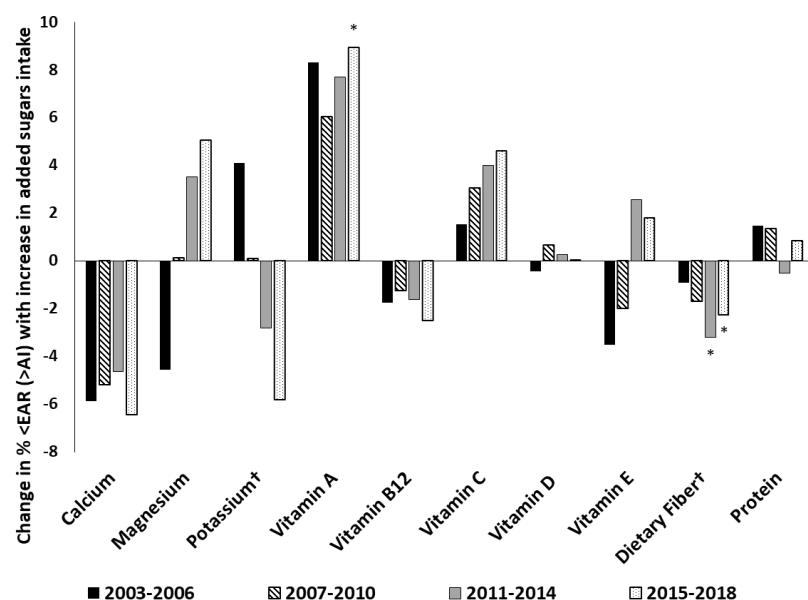

**1D Coffee and Tea**

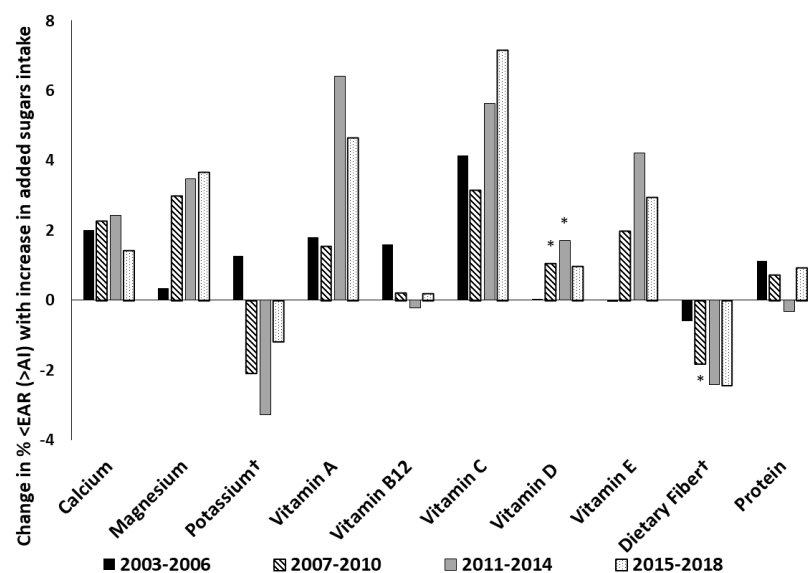

EAR, estimated average requirement; AI, adequate intake

†>AI for potassium and dietary fiber

\*Statistically significant at  $p < 0.05$ ; from regression analysis, test for trend across quantiles of added sugars intake

Intakes of added sugars, with a focus on beverages and the associations with nutrient adequacy in US adults (NHANES 2003-2018), Ricciuto L et al.

**Supplemental Table S5.** Association between added sugars intake from select beverages and % <EAR (>AI<sup>1</sup>) among adults (19+ y) by NHANES 4-y cycles

|                                | NHANES<br>2003-2006             | NHANES<br>2007-2010 | NHANES<br>2011-2014 | NHANES<br>2015-2018  |
|--------------------------------|---------------------------------|---------------------|---------------------|----------------------|
| <b>Soft Drinks</b>             |                                 |                     |                     |                      |
| <b>Nutrient</b>                | <b>Beta (SE), P<sup>2</sup></b> | <b>Beta (SE), P</b> | <b>Beta (SE), P</b> | <b>Beta (SE), P</b>  |
| Calcium                        | 1.70 (4.68), 0.75               | 1.89 (5.21), 0.75   | 3.37 (4.45), 0.53   | 1.91 (3.90), 0.67    |
| Magnesium                      | 11.29 (4.39), 0.12              | 11.44 (4.21), 0.11  | 12.42 (3.87), 0.08  | 11.01 (4.46), 0.13   |
| Potassium <sup>1</sup>         | -9.64 (3.75), 0.12              | -8.87 (3.49), 0.13  | -9.83 (2.57), 0.06  | -7.50 (2.84), 0.12   |
| Vitamin A                      | 11.08 (3.21), 0.07              | 11.91 (2.84), 0.05  | 11.36 (1.10), 0.01* | 11.15 (2.01), 0.03*  |
| Vitamin B12                    | 0.27 (1.27), 0.85               | -0.45 (0.56), 0.50  | -0.93 (0.78), 0.35  | 0.81 (1.49), 0.64    |
| Vitamin C                      | 9.88 (4.37), 0.15               | 10.25 (3.83), 0.12  | 10.77 (2.64), 0.06  | 10.94 (2.67), 0.05   |
| Vitamin D                      | 1.54 (0.28), 0.03*              | 1.35 (0.93), 0.28   | 1.19 (0.16), 0.02*  | 0.65 (0.78), 0.49    |
| Vitamin E                      | 3.72 (0.78), 0.04*              | 4.02 (1.28), 0.09   | 6.30 (0.97), 0.02*  | 6.93 (2.50), 0.11    |
| Dietary Fiber <sup>1</sup>     | -2.44 (0.36), 0.02*             | -3.83 (0.65), 0.03* | -4.20 (0.41), 0.01* | -3.86 (0.34), 0.01*  |
| Protein                        | 0.44 (0.86), 0.66               | -0.21 (0.57), 0.75  | 0.09 (0.49), 0.87   | 0.22 (0.74), 0.79    |
| <b>Fruit Drinks</b>            |                                 |                     |                     |                      |
| <b>Nutrient</b>                | <b>Beta (SE), P</b>             | <b>Beta (SE), P</b> | <b>Beta (SE), P</b> | <b>Beta (SE), P</b>  |
| Calcium                        | -0.81 (3.00), 0.81              | 0.42 (2.66), 0.89   | 0.13 (2.63), 0.97   | 3.84 (4.57), 0.49    |
| Magnesium                      | 0.66 (3.97), 0.88               | 1.58 (3.88), 0.72   | 1.98 (3.32), 0.61   | 3.62 (3.61), 0.42    |
| Potassium <sup>1</sup>         | -1.19 (3.64), 0.77              | -1.61 (2.99), 0.64  | -1.97 (2.19), 0.46  | -2.79 (2.24), 0.34   |
| Vitamin A                      | 1.72 (4.82), 0.76               | 1.19 (3.27), 0.75   | 3.06 (2.40), 0.33   | 6.79 (4.87), 0.30    |
| Vitamin B12                    | 1.03 (1.50), 0.56               | -0.19 (0.35), 0.65  | -0.05 (0.66), 0.95  | 1.00 (0.54), 0.20    |
| Vitamin C                      | -19.45 (4.20), 0.04*            | -19.49 (5.09), 0.06 | -18.08 (4.24), 0.05 | -15.22 (2.45), 0.02* |
| Vitamin D                      | 0.82 (1.20), 0.57               | 0.43 (1.15), 0.74   | 1.16 (0.35), 0.08   | 0.21 (0.21), 0.41    |
| Vitamin E                      | 0.93 (1.13), 0.50               | 0.80 (1.59), 0.67   | 3.18 (0.45), 0.02*  | 2.29 (3.57), 0.59    |
| Dietary Fiber <sup>1</sup>     | -0.60 (0.24), 0.13              | -1.03 (0.40), 0.13  | -1.91 (1.34), 0.29  | -1.41 (0.51), 0.11   |
| Protein                        | 0.27 (0.70), 0.74               | 0.20 (0.40), 0.66   | -0.02 (0.52), 0.98  | 0.62 (0.57), 0.39    |
| <b>Sport and Energy Drinks</b> |                                 |                     |                     |                      |
| <b>Nutrient</b>                | <b>Beta (SE), P</b>             | <b>Beta (SE), P</b> | <b>Beta (SE), P</b> | <b>Beta (SE), P</b>  |
| Calcium                        | -5.87 (7.90), 0.53              | -5.19 (6.12), 0.49  | -4.65 (4.67), 0.42  | -6.44 (3.47), 0.20   |
| Magnesium                      | -4.55 (7.76), 0.62              | 0.11 (6.65), 0.99   | 3.50 (6.34), 0.64   | 5.04 (5.59), 0.46    |
| Potassium <sup>1</sup>         | 4.10 (6.63), 0.60               | 0.10 (6.84), 0.99   | -2.82 (4.38), 0.59  | -5.82 (2.45), 0.14   |
| Vitamin A                      | 8.30 (5.97), 0.30               | 6.02 (3.55), 0.23   | 7.69 (2.07), 0.07   | 8.92 (1.74), 0.04*   |
| Vitamin B12                    | -1.76 (0.56), 0.09              | -1.26 (0.38), 0.08  | -1.63 (0.66), 0.13  | -2.51 (0.66), 0.06   |
| Vitamin C                      | 1.54 (5.79), 0.81               | 3.05 (3.72), 0.50   | 3.99 (1.33), 0.10   | 4.60 (1.35), 0.08    |
| Vitamin D                      | -0.45 (2.19), 0.86              | 0.66 (0.55), 0.35   | 0.26 (0.88), 0.80   | 0.04 (0.70), 0.96    |
| Vitamin E                      | -3.53 (3.91), 0.46              | -2.01 (3.22), 0.60  | 2.55 (3.83), 0.57   | 1.80 (4.36), 0.72    |
| Dietary Fiber <sup>1</sup>     | -0.92 (0.31), 0.10              | -1.70 (0.41), 0.05  | -3.21 (0.22), 0.00* | -2.27 (0.46), 0.04*  |
| Protein                        | 1.48 (1.22), 0.35               | 1.33 (0.83), 0.25   | -0.51 (0.25), 0.18  | 0.83 (1.07), 0.52    |
| <b>Coffee and Tea</b>          |                                 |                     |                     |                      |
| <b>Nutrient</b>                | <b>Beta (SE), P</b>             | <b>Beta (SE), P</b> | <b>Beta (SE), P</b> | <b>Beta (SE), P</b>  |

Intakes of added sugars, with a focus on beverages and the associations with nutrient adequacy in US adults (NHANES 2003-2018), Ricciuto L et al.

|                                  |                    |                     |                    |                    |
|----------------------------------|--------------------|---------------------|--------------------|--------------------|
| <b>Calcium</b>                   | 2.01 (2.36), 0.48  | 2.26 (4.15), 0.64   | 2.42 (2.52), 0.44  | 1.43 (4.18), 0.76  |
| <b>Magnesium</b>                 | 0.33 (3.02), 0.92  | 2.98 (3.53), 0.49   | 3.47 (2.76), 0.34  | 3.66 (5.00), 0.54  |
| <b>Potassium<sup>1</sup></b>     | 1.26 (2.90), 0.71  | -2.08 (2.51), 0.49  | -3.28 (3.00), 0.39 | -1.19 (3.34), 0.76 |
| <b>Vitamin A</b>                 | 1.80 (3.59), 0.67  | 1.55 (3.42), 0.69   | 6.40 (2.73), 0.14  | 4.66 (2.68), 0.22  |
| <b>Vitamin B12</b>               | 1.58 (1.30), 0.35  | 0.22 (0.74), 0.80   | -0.23 (1.13), 0.86 | 0.19 (0.74), 0.82  |
| <b>Vitamin C</b>                 | 4.14 (3.35), 0.34  | 3.16 (4.42), 0.55   | 5.63 (3.42), 0.24  | 7.15 (2.41), 0.10  |
| <b>Vitamin D</b>                 | 0.02 (1.51), 0.99  | 1.05 (0.19), 0.03*  | 1.70 (0.18), 0.01* | 0.97 (0.33), 0.10  |
| <b>Vitamin E</b>                 | -0.05 (0.80), 0.96 | 1.98 (1.21), 0.24   | 4.21 (1.45), 0.10  | 2.95 (2.49), 0.36  |
| <b>Dietary Fiber<sup>1</sup></b> | -0.60 (0.86), 0.56 | -1.81 (0.38), 0.04* | -2.42 (0.95), 0.13 | -2.44 (0.97), 0.13 |
| <b>Protein</b>                   | 1.11 (0.63), 0.22  | 0.73 (0.72), 0.42   | -0.33 (0.29), 0.37 | 0.94 (0.87), 0.39  |

EAR, estimated average requirement; AI, adequate intake

<sup>1</sup>>AI for potassium and dietary fiber

<sup>2</sup>Beta represents the regression coefficient (change) in percentage of the population <EAR (>AI) across quantiles of added sugars from the select beverage, testing hypothesis that regression coefficient (slope) equals 0

\*Statistically significant at p<0.05

Intakes of added sugars, with a focus on beverages and the associations with nutrient adequacy in US adults (NHANES 2003-2018), Ricciuto L et al.

**Supplemental Table S6.** Quartiles of added sugars intake (% kcal) from the rest of the diet and trends in % <EAR (>AI<sup>1</sup>) for selected nutrients among adults from the pooled sample (NHANES 2003-2018, n=35,128); weighted n's are shown in the table

| <b>19-50 y</b><br><b>(n=18,110)</b> |                                    |                                            |                                              |                                     |                                   |
|-------------------------------------|------------------------------------|--------------------------------------------|----------------------------------------------|-------------------------------------|-----------------------------------|
| <b>Added Sugars</b><br>(% kcal)     | <b>Q1</b><br>n=31,557,211<br><3.48 | <b>Q2</b><br>n=31,579,320<br>3.48 to ≤6.08 | <b>Q3</b><br>n=31,574,933<br>>6.08 to ≤9.33  | <b>Q4</b><br>n=31,575,369<br>>9.33  | <b>Quartile Trend<sup>2</sup></b> |
|                                     | <b>% &lt;EAR* (SE)</b>             | <b>% &lt;EAR* (SE)</b>                     | <b>% &lt;EAR* (SE)</b>                       | <b>% &lt;EAR* (SE)</b>              | <b>Beta (SE), P</b>               |
| <b>Calcium</b>                      | 54.98 (1.50)                       | 38.10 (1.32)                               | 26.05 (1.53)                                 | 16.57 (0.93)                        | -12.80 (1.18), 0.01†              |
| <b>Magnesium</b>                    | 69.85 (1.26)                       | 59.39 (1.54)                               | 49.00 (1.52)                                 | 32.09 (1.33)                        | -12.30 (1.11), 0.01†              |
| <b>Potassium<sup>1</sup></b>        | 16.02 (1.15)                       | 23.29 (1.30)                               | 31.59 (1.32)                                 | 52.98 (1.42)                        | 11.78 (2.38), 0.04§               |
| <b>Vitamin A</b>                    | 70.25 (1.56)                       | 55.97 (1.68)                               | 43.59 (1.67)                                 | 24.95 (1.65)                        | -14.78 (0.89), 0.00†              |
| <b>Vitamin B12</b>                  | 10.63 (0.92)                       | 2.52 (0.48)                                | 1.69 (0.47)                                  | 1.21 (0.32)                         | -2.98 (1.31), 0.15                |
| <b>Vitamin C</b>                    | 54.49 (1.42)                       | 51.08 (1.43)                               | 46.09 (1.73)                                 | 41.28 (1.44)                        | -4.45 (0.26), 0.00†               |
| <b>Vitamin D</b>                    | 98.89 (0.26)                       | 97.69 (0.45)                               | 95.06 (0.67)                                 | 91.95 (0.87)                        | -2.32 (0.31), 0.02§               |
| <b>Vitamin E</b>                    | 93.69 (0.70)                       | 91.06 (1.28)                               | 84.77 (1.35)                                 | 70.53 (1.48)                        | -7.46 (1.85), 0.06                |
| <b>Dietary Fiber<sup>1</sup></b>    | 1.79 (0.30)                        | 1.72 (0.30)                                | 2.03 (0.36)                                  | 4.47 (0.62)                         | 0.81 (0.41), 0.19                 |
| <b>Protein</b>                      | 4.92 (0.71)                        | 0.89 (0.20)                                | 0.16 (0.09)                                  | 0.15 (0.07)                         | -1.54 (0.66), 0.15                |
| <b>51-70 y</b><br><b>(n=11,379)</b> |                                    |                                            |                                              |                                     |                                   |
| <b>Added Sugars</b><br>(% kcal)     | <b>Q1</b><br>n=17,907,711<br><4.41 | <b>Q2</b><br>n=17,073,548<br>4.41 to ≤7.21 | <b>Q3</b><br>n=17,258,187<br>>7.21 to ≤10.43 | <b>Q4</b><br>n=17,734,287<br>>10.43 | <b>Quartile Trend<sup>2</sup></b> |
|                                     | <b>% &lt;EAR (SE)</b>              | <b>% &lt;EAR (SE)</b>                      | <b>% &lt;EAR (SE)</b>                        | <b>% &lt;EAR (SE)</b>               | <b>Beta (SE), P</b>               |
| <b>Calcium</b>                      | 68.78 (1.32)                       | 62.69 (1.65)                               | 48.62 (1.83)                                 | 34.44 (1.60)                        | -11.49 (1.41), 0.01§              |
| <b>Magnesium</b>                    | 65.84 (1.52)                       | 63.59 (1.79)                               | 49.38 (2.20)                                 | 33.10 (2.00)                        | -10.87 (2.34), 0.04§              |
| <b>Potassium<sup>1</sup></b>        | 24.78 (1.44)                       | 26.98 (1.57)                               | 39.48 (2.01)                                 | 57.30 (2.06)                        | 10.61 (2.48), 0.05                |
| <b>Vitamin A</b>                    | 57.64 (1.77)                       | 48.74 (1.88)                               | 37.51 (2.40)                                 | 21.72 (2.00)                        | -11.74 (1.06), 0.01†              |
| <b>Vitamin B12</b>                  | 10.32 (1.05)                       | 3.38 (0.70)                                | 2.19 (0.64)                                  | 1.13 (0.35)                         | -3.04 (1.02), 0.10                |
| <b>Vitamin C</b>                    | 45.97 (1.37)                       | 46.34 (2.27)                               | 41.81 (2.12)                                 | 37.70 (2.03)                        | -2.81 (0.81), 0.07                |
| <b>Vitamin D</b>                    | 97.93 (0.38)                       | 97.45 (0.53)                               | 94.95 (0.62)                                 | 92.18 (0.91)                        | -1.91 (0.39), 0.04§               |
| <b>Vitamin E</b>                    | 92.14 (0.93)                       | 91.54 (1.15)                               | 85.79 (1.75)                                 | 71.12 (2.03)                        | -6.56 (2.17), 0.09                |
| <b>Dietary Fiber<sup>1</sup></b>    | 9.36 (0.92)                        | 8.26 (0.77)                                | 11.70 (1.23)                                 | 18.43 (1.61)                        | 2.87 (1.23), 0.14                 |
| <b>Protein</b>                      | 5.59 (0.67)                        | 1.57 (0.34)                                | 0.35 (0.12)                                  | 0.28 (0.11)                         | -1.81 (0.63), 0.10                |
| <b>71+ y</b><br><b>(n=5,639)</b>    |                                    |                                            |                                              |                                     |                                   |
| <b>Added Sugars</b><br>(% kcal)     | <b>Q1</b><br>n=5,798,155<br><5.27  | <b>Q2</b><br>n=6,615,333<br>5.27 to ≤8.33  | <b>Q3</b><br>n=6,471,226<br>>8.33 to ≤11.52  | <b>Q4</b><br>n=6,001,044<br>>11.52  | <b>Quartile Trend<sup>2</sup></b> |
|                                     | <b>% &lt;EAR (SE)</b>              | <b>% &lt;EAR (SE)</b>                      | <b>% &lt;EAR (SE)</b>                        | <b>% &lt;EAR (SE)</b>               | <b>Beta (SE), P</b>               |
| <b>Calcium</b>                      | 85.95 (1.35)                       | 77.66 (1.98)                               | 67.60 (2.15)                                 | 55.11 (1.83)                        | -10.21 (0.67), 0.00†              |
| <b>Magnesium</b>                    | 76.67 (1.57)                       | 71.50 (1.61)                               | 64.67 (2.07)                                 | 48.82 (1.95)                        | -8.91 (1.76), 0.04§               |
| <b>Potassium<sup>1</sup></b>        | 17.74 (1.47)                       | 22.76 (1.69)                               | 29.68 (2.12)                                 | 46.59 (2.02)                        | 9.20 (1.95), 0.04§                |
| <b>Vitamin A</b>                    | 47.88 (2.35)                       | 36.73 (2.03)                               | 26.80 (2.28)                                 | 14.73 (2.13)                        | -10.92 (0.28), 0.00†              |

Intakes of added sugars, with a focus on beverages and the associations with nutrient adequacy in US adults (NHANES 2003-2018), Ricciuto L et al.

|                                   |              |              |              |              |                     |
|-----------------------------------|--------------|--------------|--------------|--------------|---------------------|
| <b>Vitamin B12</b>                | 10.52 (1.73) | 3.06 (0.77)  | 1.80 (0.63)  | 1.55 (0.51)  | -2.88 (1.24), 0.15  |
| <b>Vitamin C</b>                  | 43.28 (2.28) | 37.29 (2.17) | 34.52 (2.02) | 31.13 (1.79) | -3.94 (0.52), 0.02§ |
| <b>Vitamin D</b>                  | 96.25 (0.59) | 94.66 (0.79) | 93.01 (1.10) | 91.08 (1.00) | -1.71 (0.06), 0.00† |
| <b>Vitamin E</b>                  | 94.83 (0.83) | 93.98 (0.96) | 91.06 (1.19) | 80.93 (1.75) | -4.35 (1.51), 0.10  |
| <b>Dietary Fiber</b> <sup>1</sup> | 8.49 (0.92)  | 7.69 (0.78)  | 10.33 (1.17) | 15.47 (1.67) | 2.30 (0.96), 0.14   |
| <b>Protein</b>                    | 12.88 (1.49) | 5.04 (0.78)  | 1.60 (0.42)  | 1.38 (0.33)  | -3.88 (1.23), 0.09  |

EAR, estimated average requirement; AI, adequate intake

<sup>1</sup>>AI for potassium and dietary fiber

<sup>2</sup>From regression analysis, test for trend

†Statistically significant at  $p < 0.01$ ; §Statistically significant at  $p < 0.05$
